# Supplementary material for: Characteristics of hydrochar and hydrothermal liquid products from hydrothermal carbonization of corncob
Source: Springer Nature journal article supplement (doi:10.1007/s13399-017-0279-1), 2017-07-21
Supplement: MOESM1 [file 13322098]

**Supplementary Data**

**Characteristics of hydrochar and hydrothermal liquid products from hydrothermal carbonization of corncob**

**Kamonwat Nakasona,b, Bunyarit Panyapinyopola,b*, Vorapot Kanokkantapongc, Nawin Viriya-empikuld, Wasawat Kraithonge, Prasert Pavasantf**

*aDepartment of Sanitary Engineering, Faculty of Public Health, Mahidol University, Bangkok, Thailand*

*bCenter of Excellence on Environmental Health and Toxicology (EHT), Bangkok, Thailand*

*cDepartment of Environmental Science, Faculty of Science, Chulalongkorn University, Bangkok, Thailand*

*dThe Joint Graduate School of Energy and Environment, King Mongkut's University of Technology Thonburi, Bangkok, Thailand*

*eNational Nanotechnology Center (NANOTEC), National Science and Technology Development Agency (NSTDA), Pathumthani, Thailand*

*fDepartment of Chemical Engineering, School of Energy Science and Engineering, Vidyasirimedhi Institute of Science and Technology, Rayong, Thailand*

**Corresponding author: Tel.: +662 2354 8540, Email address: bunyarit.pan@mahidol.ac.th*

1. **Calculation of hydrochar properties**

The hydrochar yield (Hy), energy densification (Ed), energy yield (Ey), carbon densification (Cd), carbon yield (Cy), FC densification (FCd), FC yield (FCy), HHV improvement, and fuel ratio are calculated according to Equations (S.1) to (S.9) in ref. [14, 49-50]:

Hy (%) = (mass of total dried hydrochar / mass of total dried feedstock) x 100% (S.1)

Ed = HHV of dried hydrochar / HHV of dried feedstock (S.2)

Ey (%) = Hydrochar yield × Ed (S.3)

Cd = Carbon content of dried hydrochar / Carbon content of dried feedstock (S.4)

Cy (%) = Hydrochar yield x Cd (S.5)

FCd = FC content of dried hydrochar / FC content of dried feedstock (S.6)

FCy (%) = Hydrochar yield x FCd (S.7)

HHV improvement = (HHV of hydrochar - HHV of feedstock) / HHV of feedstock (S.8)

Fuel ratio = FC/VM (S.9)

**
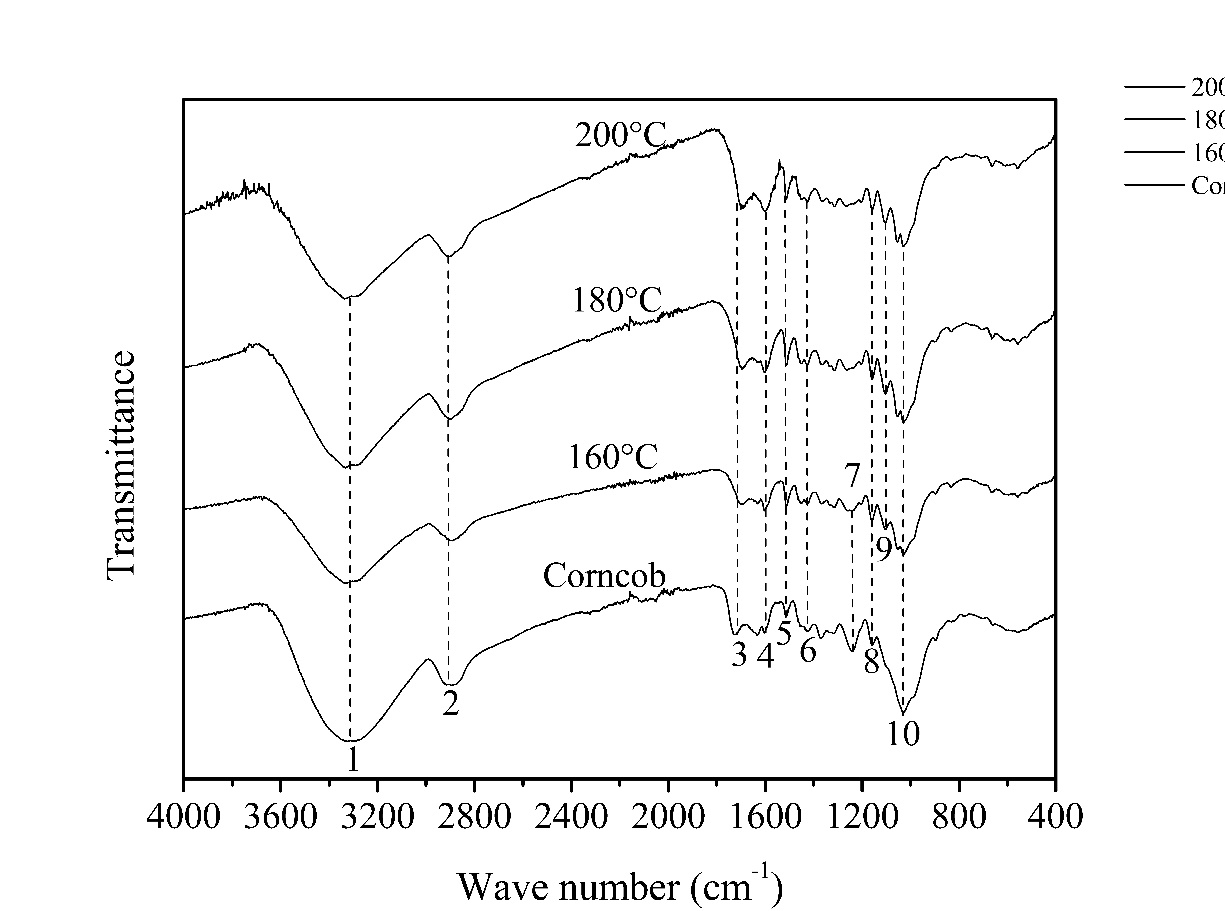
Fig. S1.** FTIR spectra of CC and hydrochar (3 h residence time and biomass to water ratio of 1:5)

**Table S1.** The efficiency of HTC on biomass [12-20]

| Feedstocks | Feedstock Properties | | | | | | | | HTC condition | Hydrochar yield (wt.% dry basis) | HHV (M/Jkg) | Ref. |
| --- | --- | --- | --- | --- | --- | --- | --- | --- | --- | --- | --- | --- |
| Ultimate analysis (wt.% dry basis) | | | | | Proximate analysis (wt.% dry basis) | | |
| C | H | N | S | O | Ash | FC | VM |
| Corn stalk | 44.9 | 5.8 | 0.7 | - | 44.2 | 4.4 | - | - | 180 – 290 ˚C for 8 h | 36 - 71 | 20.8-29.8 | [12] |
| Olive stone | - | - | - | - | - | - | - | - | 150 – 250 ˚C for 3.2 – 36.8 h | 31.0 – 55.8 | 22.2 – 29.6 | [13] |
| Waste eucalyptus bark | 45.2 | 6.4 | - | - | 48.4 | 3.6 | 15.8 | 80.6 | 220 – 300 ˚C for 2 – 10 h | 40.0 – 46.4 | 20.2 – 29.2 | [14] |
| Palm oil residue | 45.0 | 6.4 | 0.3 | - | - | 14.2 | 20.0 | 55.9 | 100 – 200 ˚C for 0.5 – 1.5 h | - | 18.1 – 23.8 | [15] |
| Water hyacinth | 29.8 | 5.4 | 2.0 | 0.3 | 24.7 | 38.1 | 6.3 | 50.0 | 240 ˚C for 0.5 – 24 h | - | 16.8 – 20.6 | [16] |
| Poultry litter | 42.2 | 5.6 | - | - | 31.0 | 16.4 | - | - | 150 – 300 ˚C for 0.5 – 8 h | 26.4 – 87.2 | 17.3 – 23.5 | [17] |
| Tomato peel waste | 52.0 | 7.4 | 1.4 | 0.1 | 39.1 | - | - | - | 150 – 250 ˚C for 1.6 – 18.4 h | 27.6 – 87.7 | 23.6 – 34.6 | [18] |
| Poplar wood | 46.7 | 6.2 | 0.1 | - | 47.0 | - | - | - | 300 ˚C for 10 min | 32.1 | 16.4 | [19] |
| Cellulose | 43 | 6.4 | 0 | - | 50.1 | 0.5 | 6.1 | 93.4 | 150 – 280 ˚C for 0.5 h | 46.2 – 92.5 | 16.6 – 27.7 | [20] |

**Table S2.** Functional groups of raw CC and hydrochar

| Wave number (cm-1) | Functional groups | Compounds | Sources | Ref. |
| --- | --- | --- | --- | --- |
| 3500-3300 | O-H | H2O, hydroxyl, or carbonyl group | Cellulose, lignin | [12] |
| 3000-2800 | C-H | Aliphatic C-H | Hemicellulose | [45, 50] |
| 1730-1700 | C=O | Ketone and carbonyl | Lignin | [12, 50] |
| 1632-1605 | C=C | Benzene stretching ring | Lignin | [12, 50] |
| 1515 | C=C | Aromatic skeletal | Lignin | [12] |
| 1440 | C-H | Benzene C-H | Lignin | [45] |
| 1280-1247 | O-CH3 | Arylalkyl ethers | Lignin | [50] |
| 1170-1160 | C-O-C | Pyranose ring skeletal | Cellulose | [12, 50] |
| 1108-1103 | C-O | C-OH | Cellulose | [12, 50] |
| 1060-1030 | C-OH | C-OH (ethanol) | Cellulose, lignin | [12, 50] |

| R.T. (min) | Compounds | Formula | Area (%) | | |
| --- | --- | --- | --- | --- | --- |
| 200 ˚C | 180 ˚C | 160 ˚C |
| 7.21 | Furfural | C5H4O2 | 28.90 | 42.22 | 42.23 |
| 12.27 | 2-Furancarboxaldehyde, 5-methyl- | C6H6O2 | 0.52 | 0.66 | 0.42 |
| 13.29 | Phenol | C6H6O | 0.31 | 0.28 | - |
| 14.40 | 1H-Pyrrole-2-carboxaldehyde | C5H5NO | 0.25 | 0.18 | 0.15 |
| 15.17 | 2-Cyclopenten-1-one, 2-hydroxy-3-methyl- | C6H8O2 | 0.36 | 0.25 | - |
| 15.51 | L-(+)-Lactic acid, trimethylsilyl ether | C6H14O3Si | 0.17 | - | - |
| 16.95 | Levulinic acid | C5H8O3 | 0.03 | 0.40 | - |
| 17.29 | 2-Furancarboxylic acid | C5H4O3 | - | - | 0.11 |
| 17.59 | furan-2,5-dicarboxaldehyde | C6H4O3 | 0.61 | 1.59 | 1.21 |
| 18.17 | Phenol, 2-methoxy- | C7H8O2 | 0.39 | 0.32 | 0.13 |
| 18.69 | Undecane | C11H24 | 0.35 | 0.21 | 0.27 |
| 21.89 | Phenol, 4-ethyl- | C8H10O | 0.10 | - | - |
| 23.40 | 1,2-Benzenediol | C6H6O2 | 0.10 | 0.13 | - |
| 24.30 | 4-vinylphenol | C8H8O | - | - | 0.79 |
| 24.77 | 5-Hydroxymethylfurfural | C6H6O3 | 14.85 | 22.35 | 25.34 |
| 25.62 | 2-Cyclohexen-1-one, 4-(1-methylethyl)- | C9H14O | 0.24 | - | - |
| 25.98 | Benzene, 1,3-bis(1,1-dimethylethyl)- | C14H22 | 0.24 | 0.18 | - |
| 26.82 | Ethanone, 1-(2,5-dihydroxyphenyl)- | C8H8O3 | 0.20 | - | - |
| 27.05 | Phenol, 4-ethyl-2-methoxy- | C9H12O2 | 0.10 | 0.11 | - |
| 27.75 | Phenol, 4-(1,1-dimethylethyl)- | C10H14O | - | 0.11 | - |
| 28.31 | Benzaldehyde, 3-hydroxy- | C7H6O2 | 0.14 | 0.12 | - |
| 28.46 | 5-Acetoxymethyl-2-furaldehyde | C8H8O4 | 0.16 | 0.15 | 0.16 |
| 30.26 | Phenol, 2,6-dimethoxy- | C8H10O3 | 0.24 | 0.14 | - |
| 30.63 | Benzaldehyde, 4-hydroxy- | C7H6O2 | 0.36 | 0.41 | 0.53 |
| 31.03 | Creosol | C8H10O2 | - | 0.09 | - |
| 32.12 | Ethanone, 1-(3-hydroxyphenyl)- | C8H8O2 | 0.15 | 0.07 | - |
| 32.25 | Vanillin | C8H8O3 | 1.25 | 1.29 | 2.47 |
| 33.98 | Ethanone, 1-(4-hydroxyphenyl)- | C8H8O2 | 0.11 | 0.08 | - |
| 35.89 | Ethanone, 1-(4-hydroxy-3-methoxyphenyl)- Acetovanillone | C9H10O3 | 0.19 | 0.13 | 0.13 |
| 42.62 | Benzaldehyde, 4-hydroxy-3,5-dimethoxy- | C9H10O4 | 0.17 | 0.12 | 0.14 |
| 47.76 | 2-Propanol, 1-chloro-, phosphate (3:1) | C9H18Cl3O4P | 0.24 | 0.17 | 0.22 |
| 51.89 | Hexadecanoic acid, methyl ester | C17H34O2 | 0.86 | 0.17 | 0.22 |
| 52.95 | Hexadecanoic acid | C16H32O2 | 0.18 | 0.12 | - |
| 57.32 | 9-Octadecenoic acid, methyl ester | C19H36O2 | 0.16 | - | - |
| 65.01 | p-Coumaric Acid | C9H8O3 | 0.34 | 0.44 | - |
| **Total area** | | | 52.25 | 72.47 | 74.50 |

**Table S3**. GC-MS analysis of hydrothermal liquid from HTC of CC (3 h residence time and biomass per water ratio of 1:5)
